# Supplementary material for: Tunable luminescence of Ce3+/Mn2+-coactivated Ca2Gd8(SiO4)6O2 through energy transfer and modulation of excitation: potential single-phase white/yellow-emitting phosphors
Source: Royal Society of Chemistry journal article supplement (doi:10.1039/c1jm11650a), 2011-01-01
Supplement: c1jm11650a.pdf [file c1jm11650a.pdf]

# Tunable Luminescence of $\text{Ce}^{3+}/\text{Mn}^{2+}$ -coactivated $\text{Ca}_2\text{Gd}_8(\text{SiO}_4)_6\text{O}_2$ through Energy Transfer and Modulation of Excitation: Potential Single-Phase White / Yellow-Emitting Phosphors

Guogang Li,<sup>a,b</sup> Dongling Geng,<sup>a,b</sup> Mengmeng Shang,<sup>a,b</sup> Chong Peng,<sup>a,b</sup> Ziyong Cheng<sup>a</sup> and Jun Lin<sup>\*a</sup>

*Received (in XXX, XXX) Xth XXXXXXXXXX 201X, Accepted Xth XXXXXXXXXX 201X*

*First published on the web Xth XXXXXXXXXX 201X*

DOI: 10.1039/b000000x

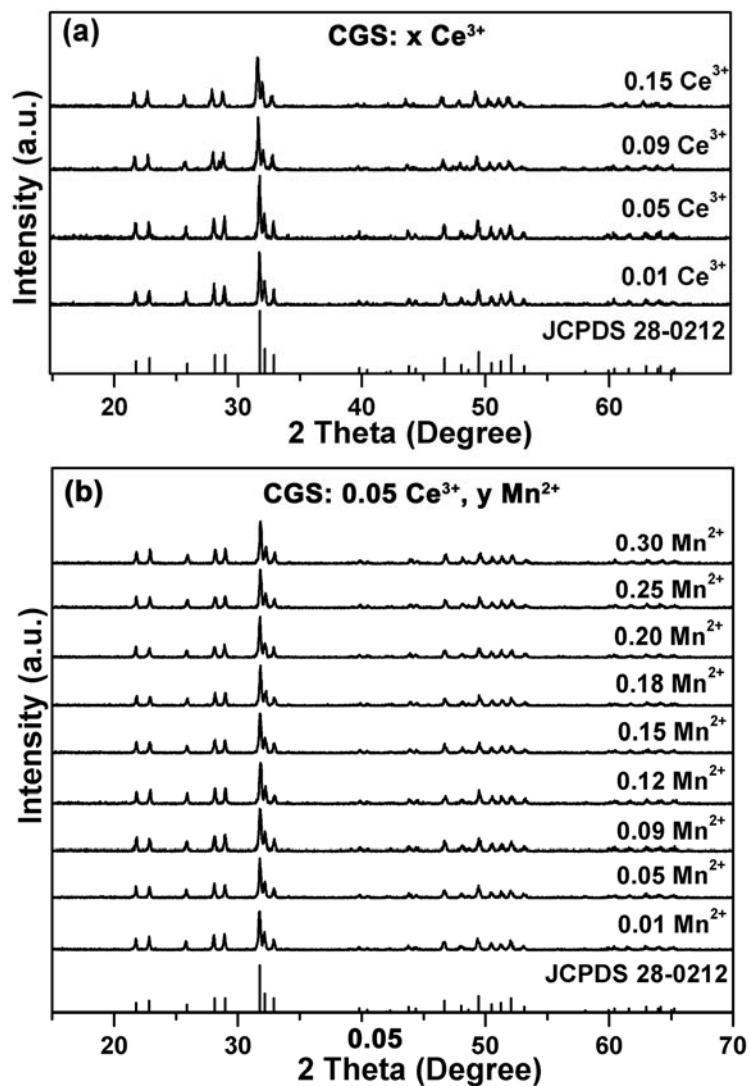

**Figure S1.** The XRD patterns of (a) CGS:  $x \text{Ce}^{3+}$  ( $x = 0.01-0.09$ ) and (b) CGS:  $0.05 \text{Ce}^{3+}, y \text{Mn}^{2+}$  ( $y = 0.01-0.30$ ) samples sintered at  $1350 \text{ }^\circ\text{C}$  for 2 h in  $\text{H}_2/\text{N}_2$  (5%/95%). The standard data of  $\text{Ca}_2\text{Gd}_8(\text{SiO}_4)_6\text{O}_2$  (JCPDS No.28-0212) is shown as reference.

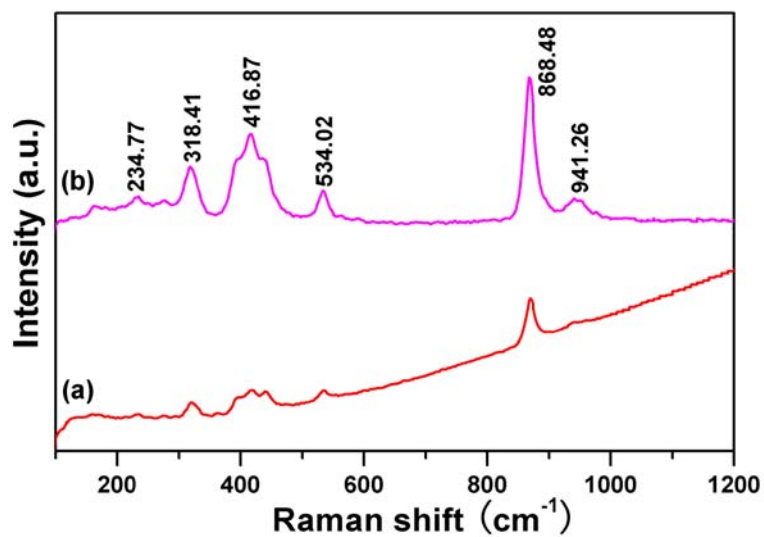

**Figure S2.** Raman spectrum of the prepared polycrystalline material Ca<sub>2</sub>Gd<sub>8</sub>(SiO<sub>4</sub>)<sub>6</sub>O<sub>2</sub> (a) and Ca<sub>2</sub>Gd<sub>8</sub>(SiO<sub>4</sub>)<sub>6</sub>O<sub>2</sub>: 0.05Ce<sup>3+</sup>, 0.03Mn<sup>2+</sup> (b) samples.

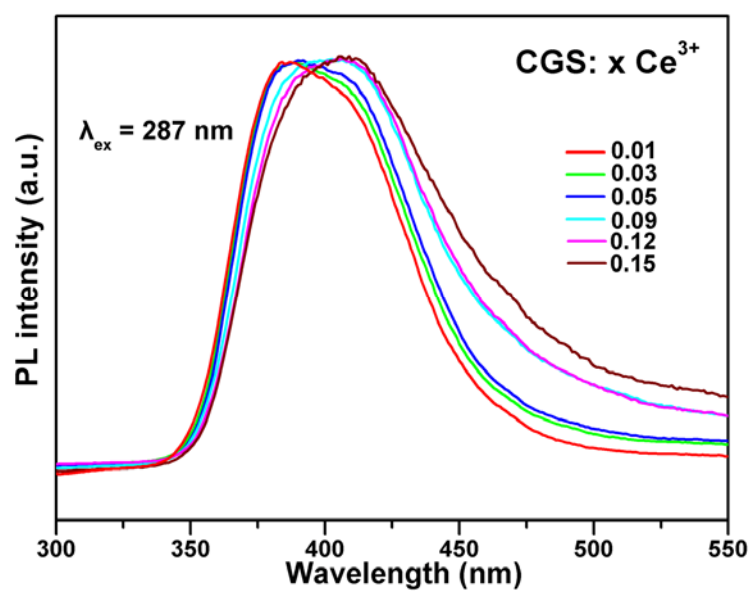

**Figure S3.** The variation of PL spectra of CGS: x Ce<sup>3+</sup> samples with the Ce<sup>3+</sup> concentration (x, mol%) under 287 nm UV excitation.

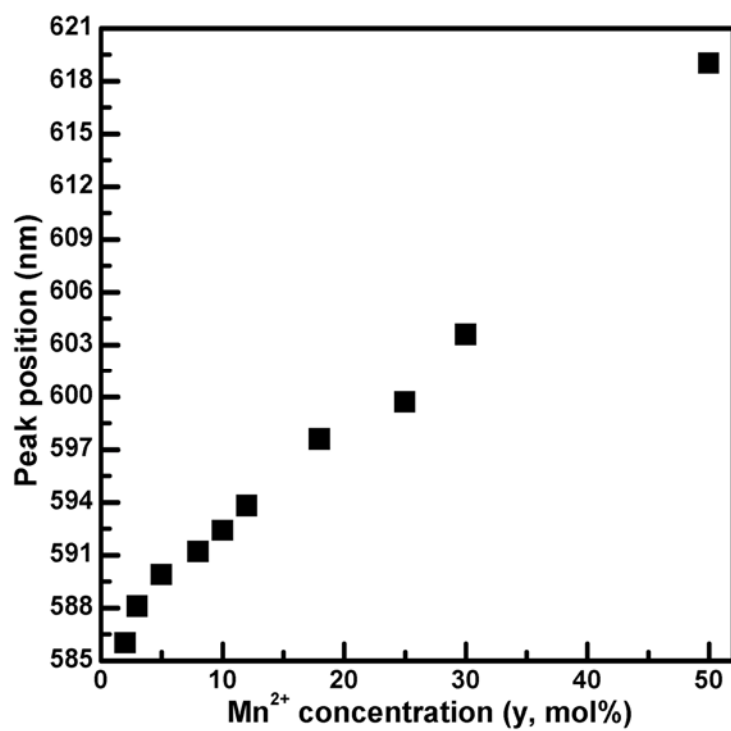

**Figure S4.** The peak position of CGS: 0.05Ce<sup>3+</sup>, yMn<sup>2+</sup> samples as a function of Mn<sup>2+</sup> concentration (y) under 287 nm UV excitation.

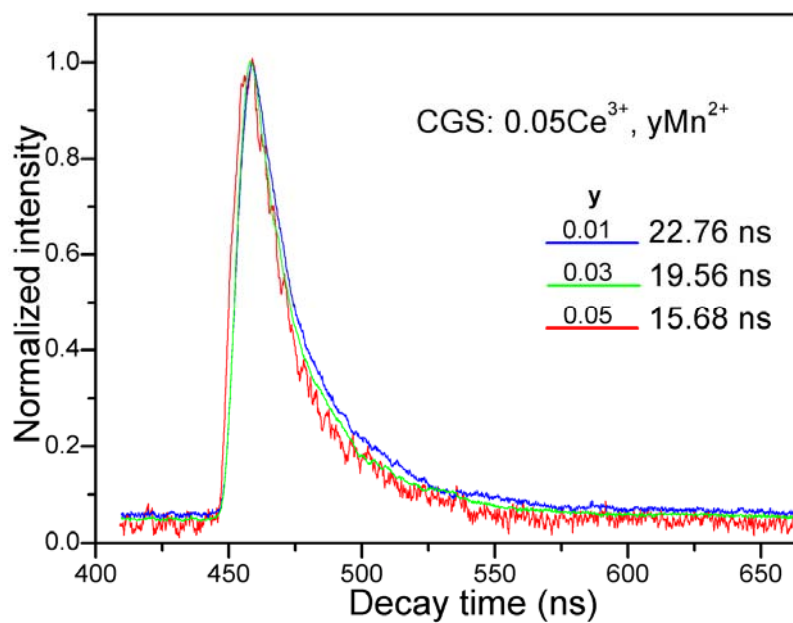

**Figure S5.** Decay curves of Ce<sup>3+</sup> emission in CGS: 0.05Ce<sup>3+</sup>, yMn<sup>2+</sup> (y = 0.01, 0.03, 0.05) samples excited at 355 nm and monitored at 428 nm.

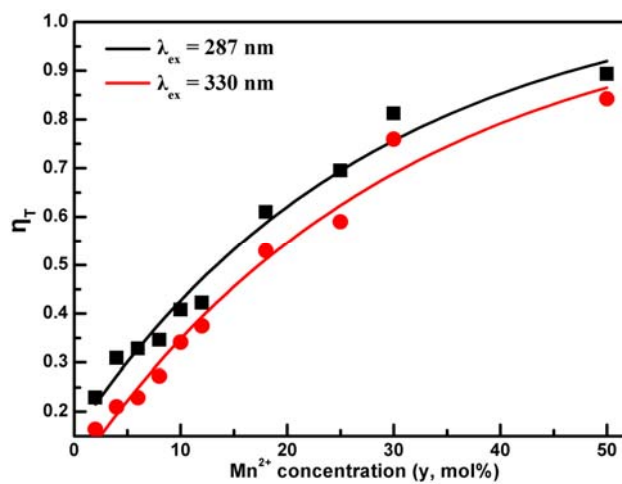

**Figure S6.** Energy transfer efficiency from  $Ce^{3+}$  to  $Mn^{2+}$  in CGS:  $0.05Ce^{3+}$ ,  $yMn^{2+}$  (0-0.50) samples ( $\lambda_{ex} = 287$  and 330 nm).
